# Supplementary material for: Mitochondrial damage and reactive oxygen species production in C. elegans: key factors in CdTe/ZnS quantum dot-Cet probes
Source: Royal Society of Chemistry journal article supplement (doi:10.1039/d4nr04227a), 2025-01-01
Supplement: d4nr04227a1.pdf [file d4nr04227a1.pdf]

Supplementary

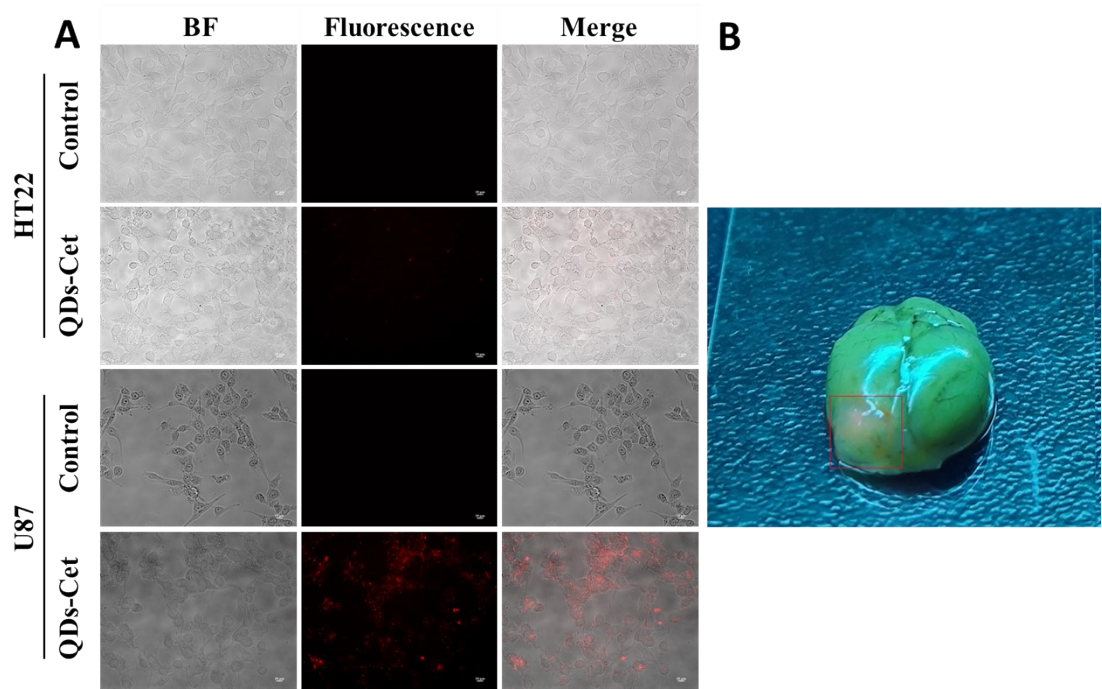

S-1: CdTe/ZnS-Cet probe in vivo and in vitro imaging. (A) CdTe/ZnS-Cet probe image in HT22 and U87 cells. (B) CdTe/ZnS-Cet probe image in tumor-bearing mice brain.

Table S1: Primers sequence of genes

|                                    |        | qRT-PCR prime           |                           |
|------------------------------------|--------|-------------------------|---------------------------|
| gene                               |        | Upstream primer (5'-3') | Downstream primer (5'-3') |
| Mitochondrial damage related genes | pink-1 | AAGCACCAGAAATTGCGACG    | ACGAGATGGGAGTGCTGGTA      |
|                                    | pdr-1  | AGCCACCGAGCGATTGATTGC   | GTGGCATTTTGGGCATCTTCTTG   |
|                                    | drp-1  | GTCAGCTGTACAAACCCGAC    | GGAGGGCCTTCATAGTTTCAAG    |
|                                    | fzo-1  | GTCCCTGCTCTTGTC AATGATT | TGCGACGAATTATTGCGTGT      |
|                                    | eat-3  | TGCCAGTGCAGCTCGACATCT   | CATACCACGTTCTAGCCGCGACA   |
| Oxidative stress-related genes     | sod-1  | CGTAGGCGATCTAGGAAATGTG  | TGACGAGCGTGTCGGTGAG       |
|                                    | sod-2  | GATACTGTCCAAAGGGAAAGAT  | GTAGTAAGCGTGCTCCCAGA      |
|                                    | sod-3  | ATCTACTGCTCGACTGCTT     | TTTCATGGCTGATTACAGGTT     |
|                                    | ctl-2  | TCCCAGATGGGTACCGTCAT    | GGTCCGAAGAGGCAAGTTGA      |
|                                    | gst-4  | TCTTGCTGAGCCAATCCGTA    | TGGCCAAATGGAGTCGTTGG      |
| actin-1                            |        | CTACGAACCTCCTGACGGACAAG | CCGGCGGACTCCATACC         |
